# Supplementary material for: Experimental study of geysers through a vent pipe connected to flowing sewers
Source: Oxford University Press journal article supplement (doi:10.2166/wst.2018.085), 2018-02-23
Supplement: wst2018085supp.docx [file wst2018085supp.docx]

# Supplementary material

Figure S1. Spray-like jets for vent pipes with different diameter *d*: (a) *d* = 40 mm; (b) *d* = 60 mm.
